# Supplementary figures and images for: TLR2 Promotes Glioma Immune Evasion by Downregulating MHC Class II Molecules in Microglia
Source: Oxford University Press journal article supplement (doi:10.1158/2326-6066.cir-18-0020), 2018-08-21

**Supplementary Figures**


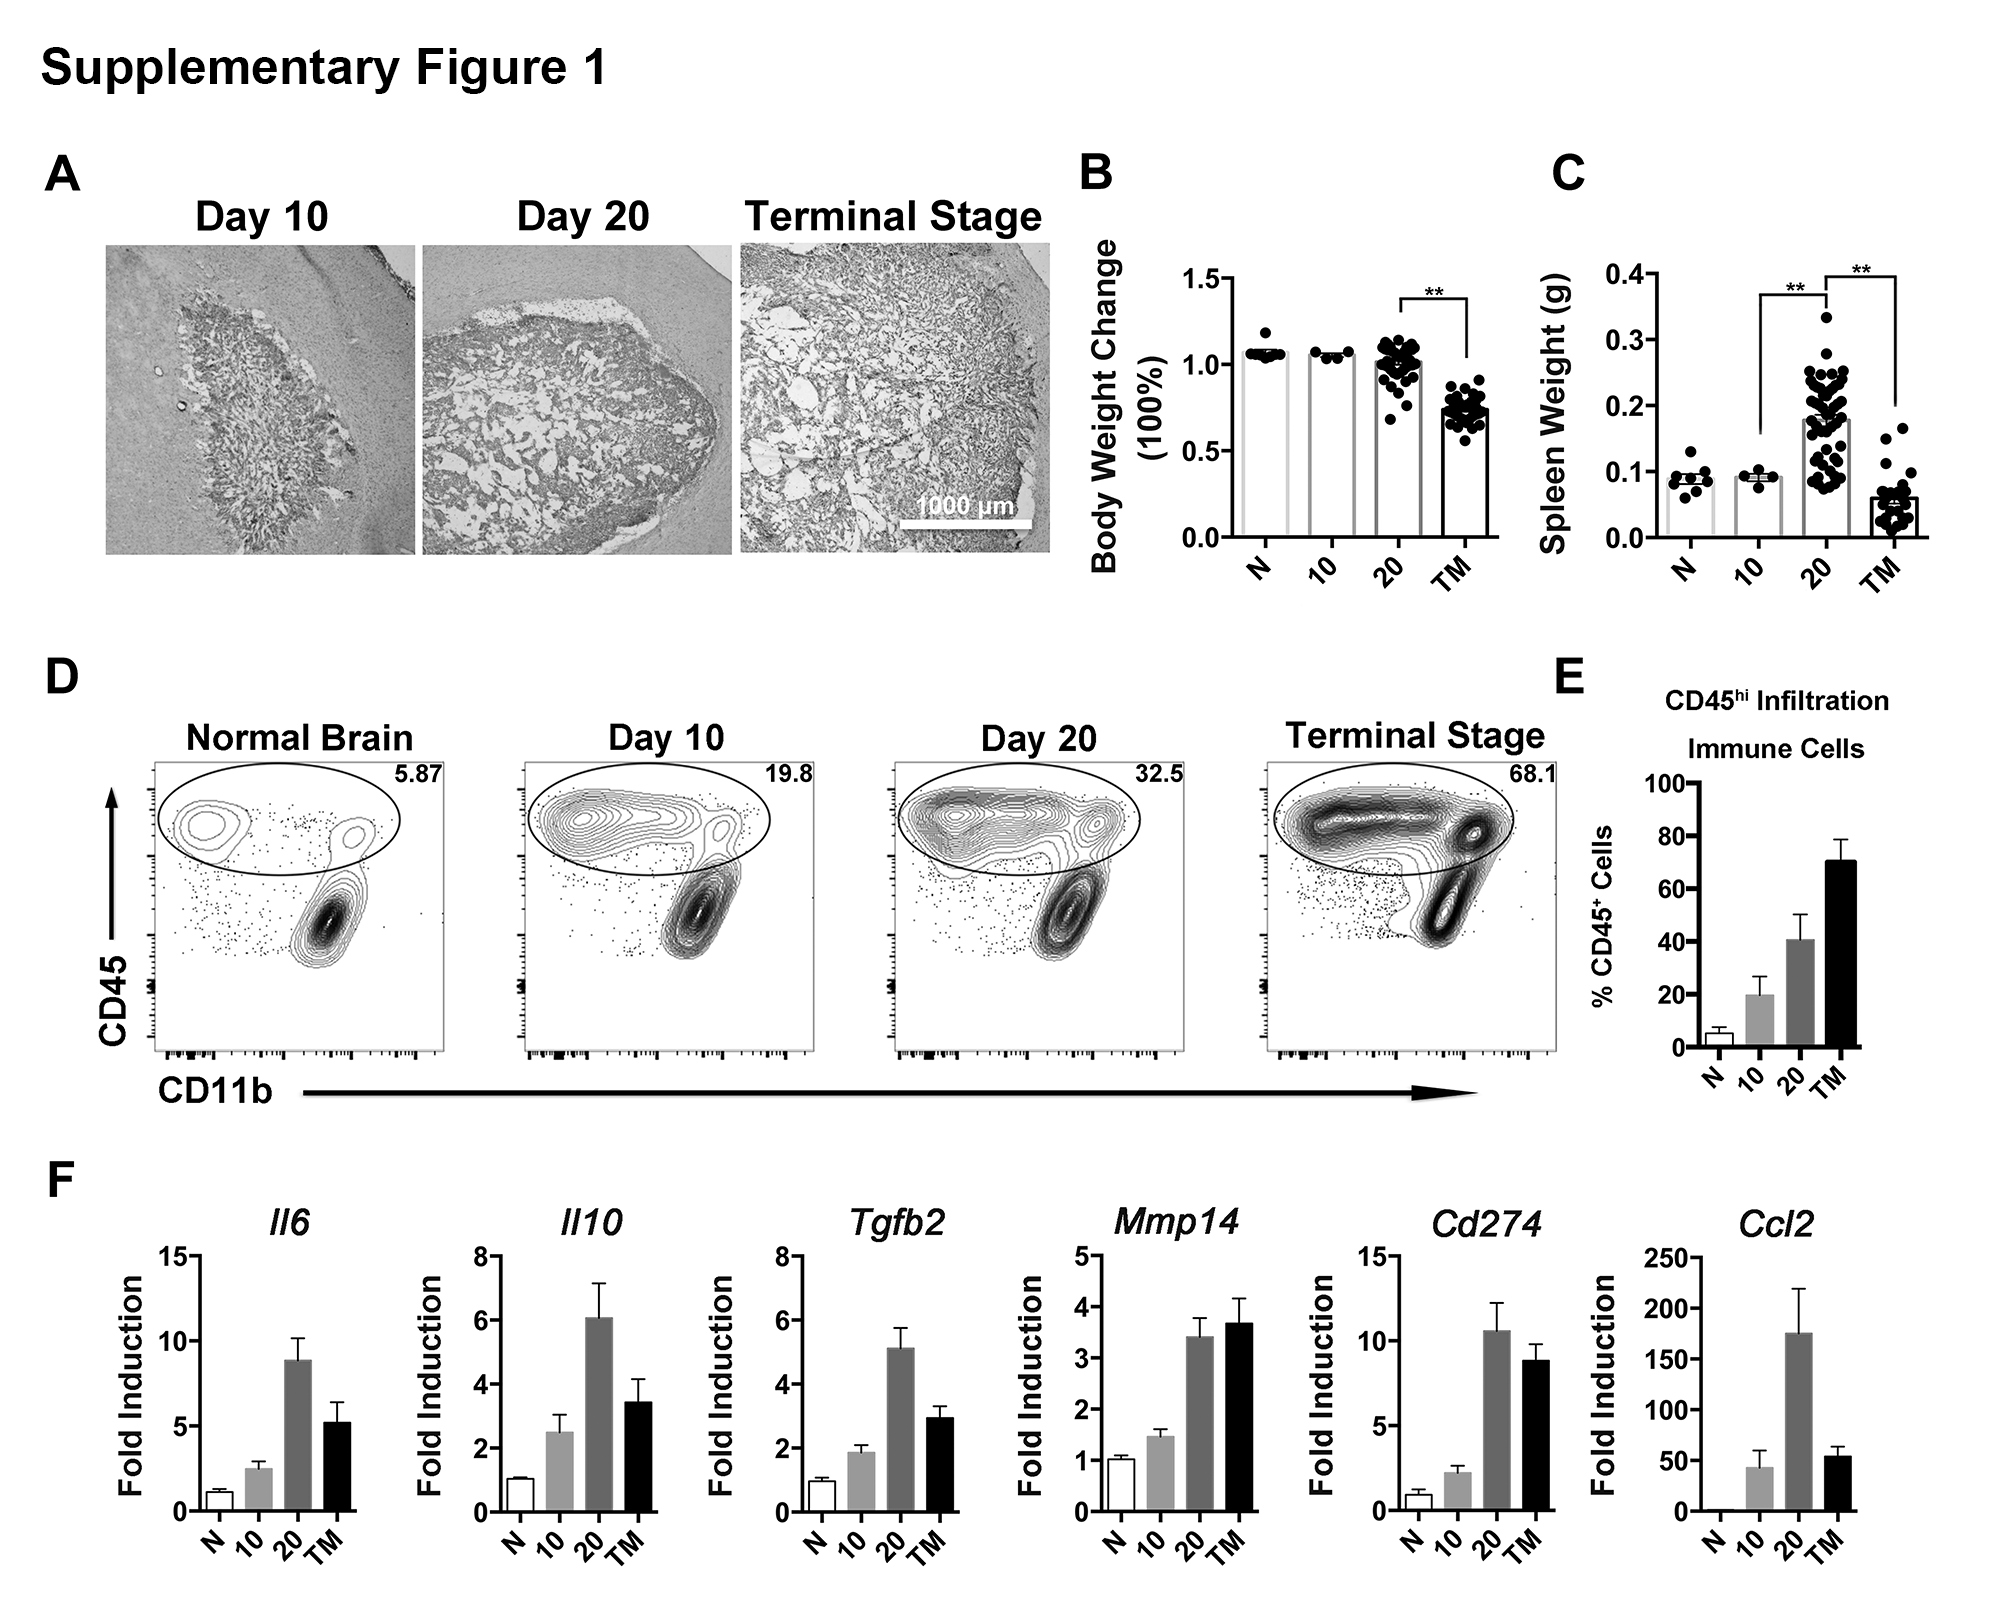


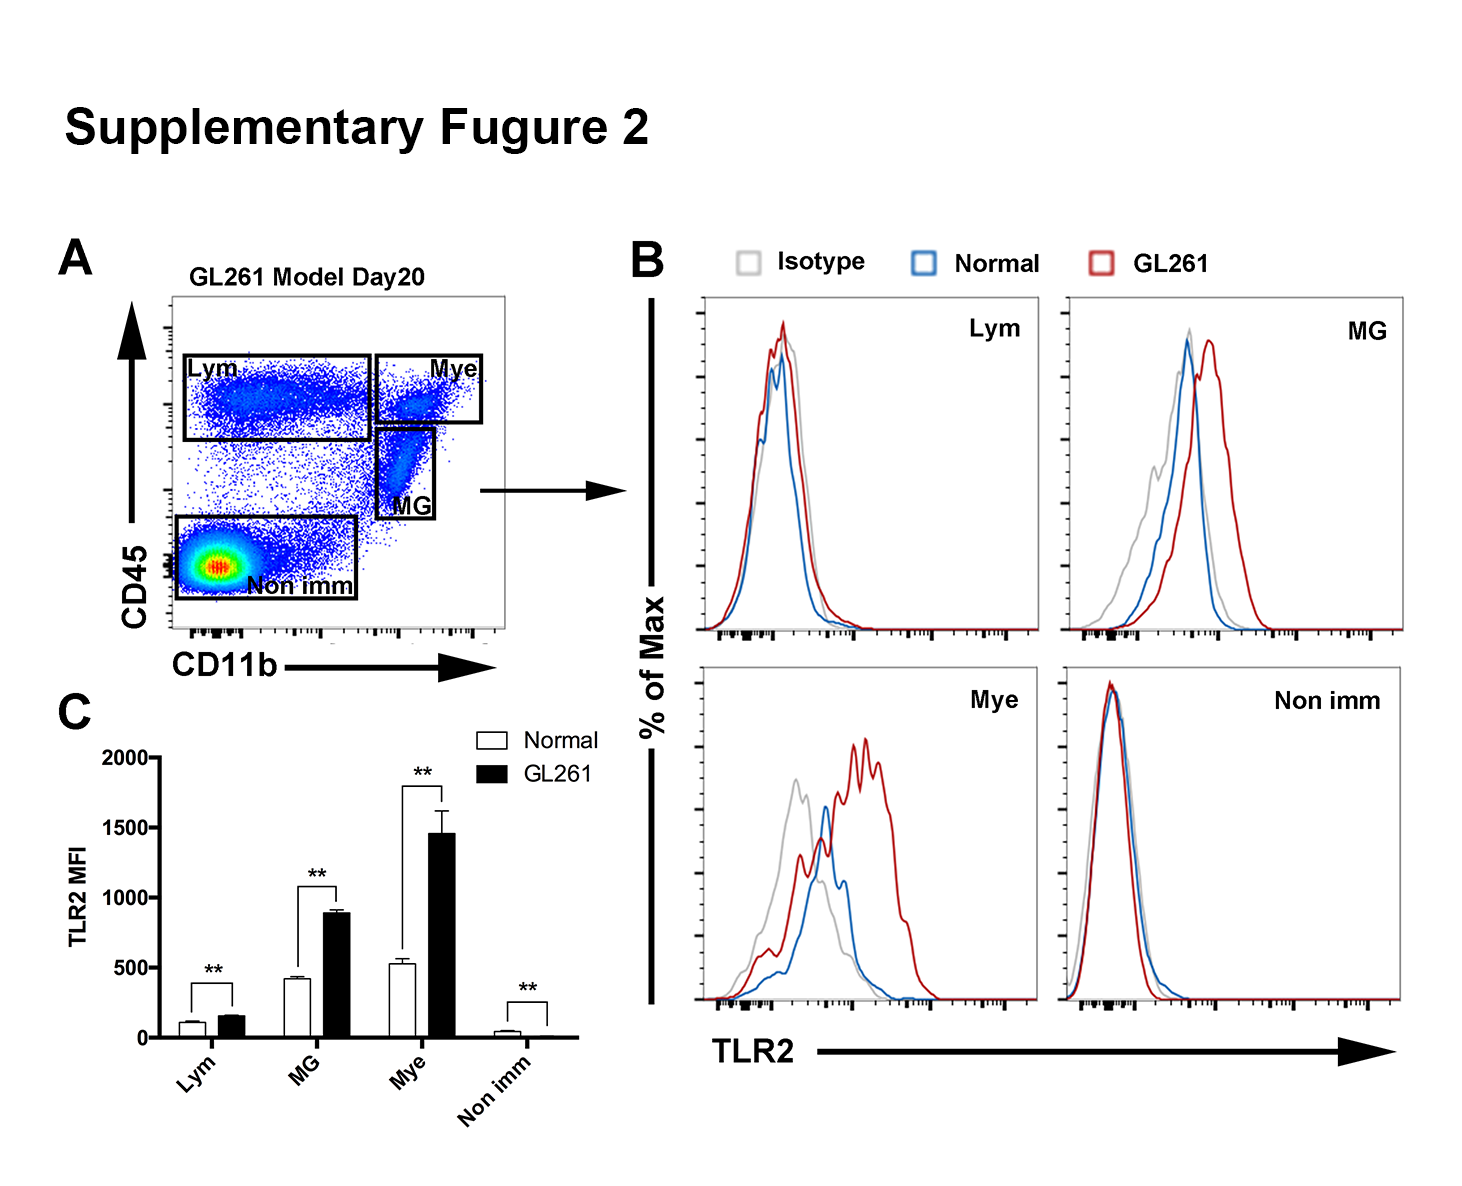


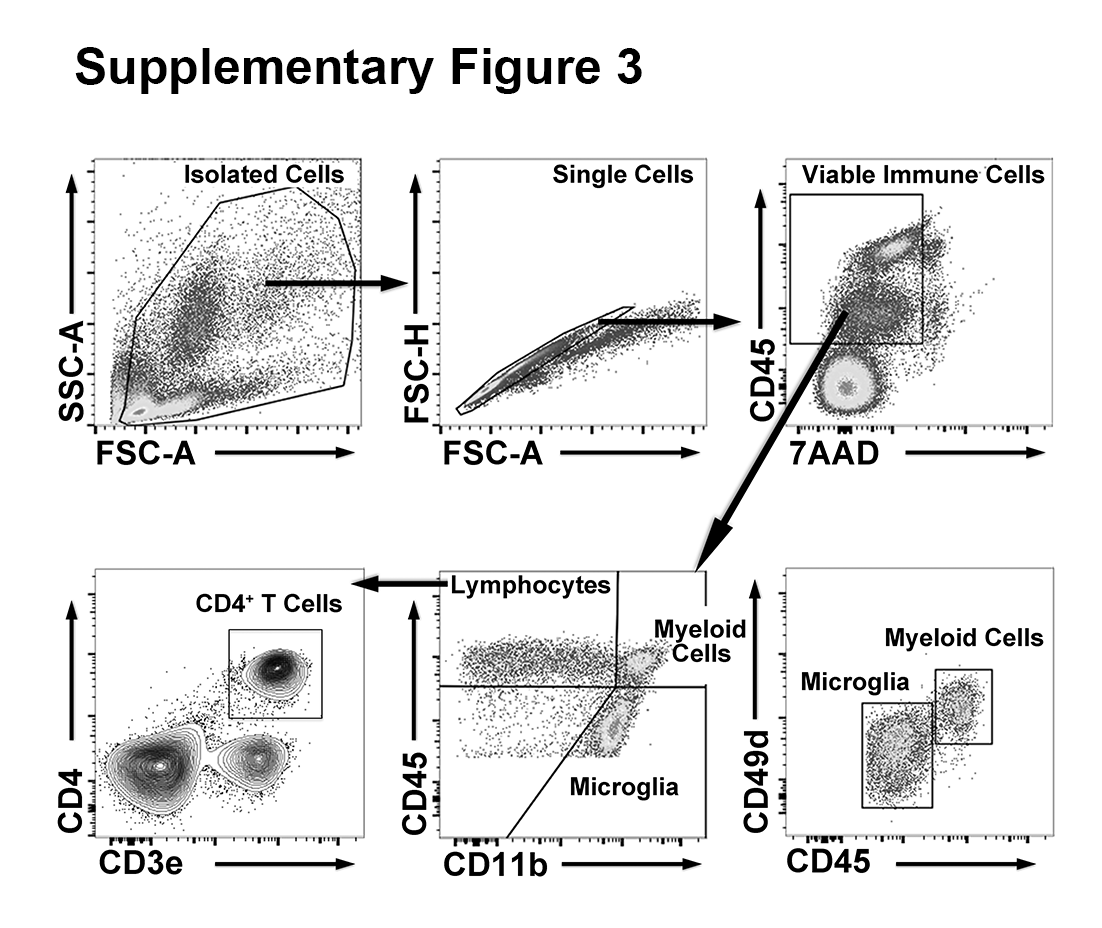


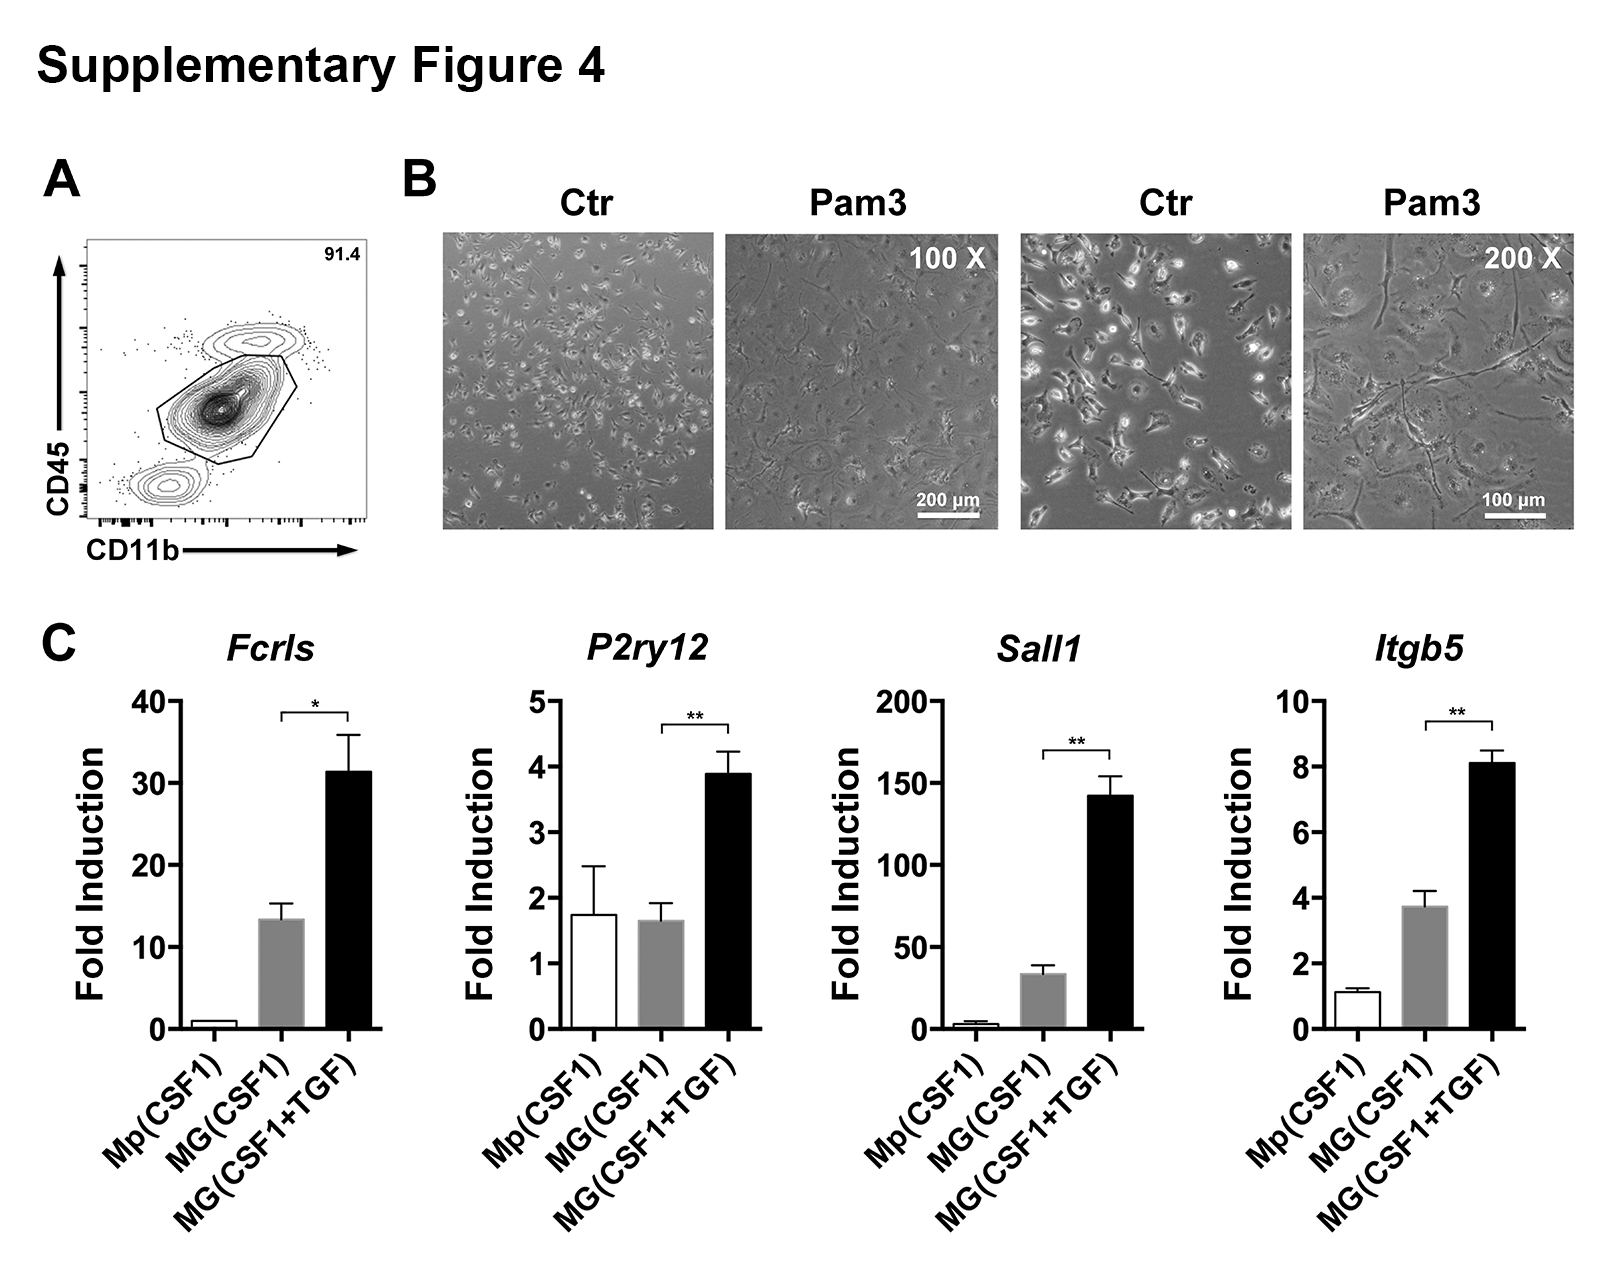


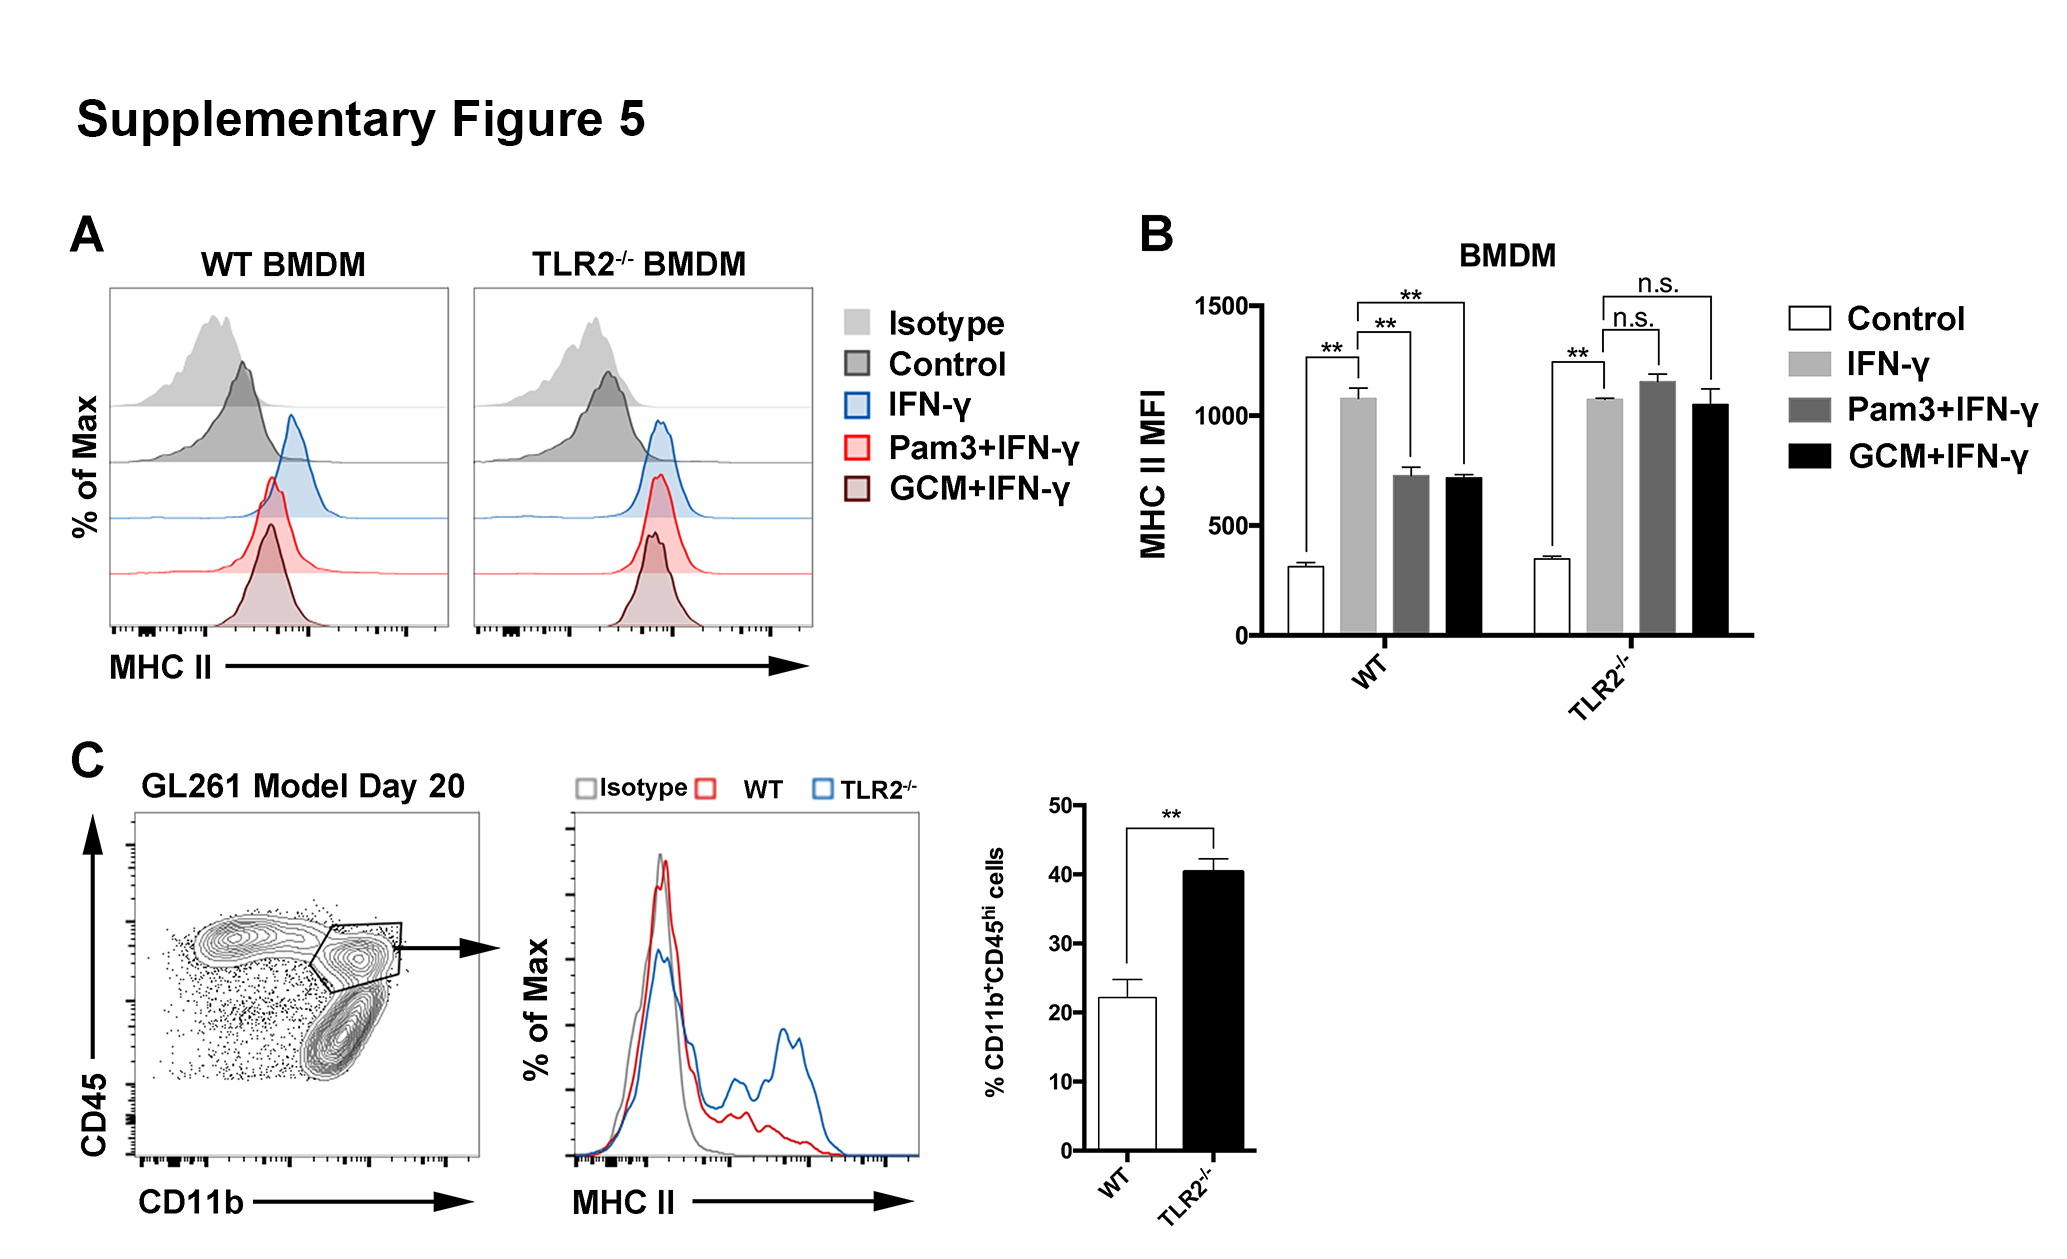


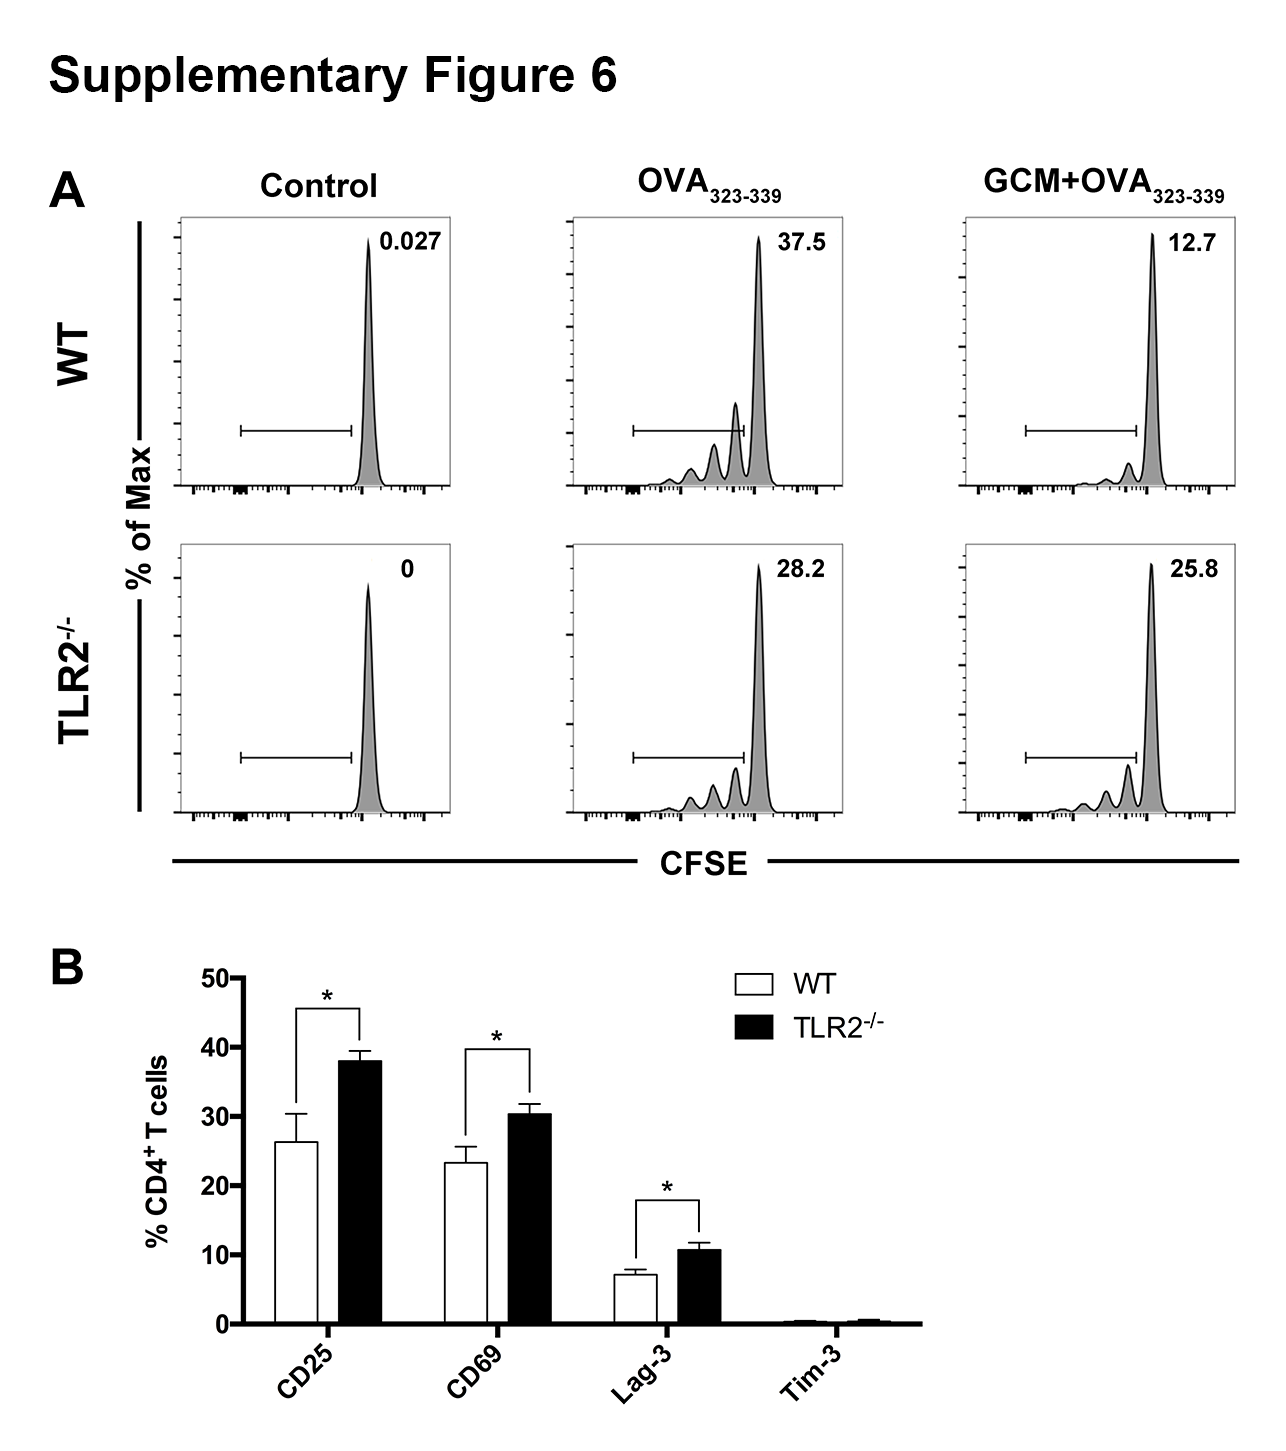

Supplement: 23266066cir180020-sup-195738_2_supp_4962537_pdft0t.doc [file 23266066cir180020-sup-195738_2_supp_4962537_pdft0t.doc]
